RESEARCH ARTICLE

# Longer chronic cannabis use in humans is associated with impaired implicit motor learning and supranormal resting state cortical activity

Shikha Prashad<sup>1\*</sup>, Andrew Y. Paek<sup>1</sup>, Lisa R. Fournier<sup>2</sup>

**1** Department of Kinesiology and Educational Psychology, Washington State University, Pullman, Washington, United States of America, **2** Department of Psychology, Washington State University, Pullman, Washington, United States of America

✉ Current address: Department of Kinesiology, University of Texas at Arlington, Arlington, TX, USA  
\* [s.prashad@uta.edu](mailto:s.prashad@uta.edu)

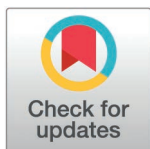

## OPEN ACCESS

**Citation:** Prashad S, Paek AY, Fournier LR (2026) Longer chronic cannabis use in humans is associated with impaired implicit motor learning and supranormal resting state cortical activity. PLoS One 21(1): e0338082. <https://doi.org/10.1371/journal.pone.0338082>

**Editor:** Gustavo Gonzalez-Cuevas, Idaho State University, UNITED STATES OF AMERICA

**Received:** May 14, 2025

**Accepted:** November 17, 2025

**Published:** January 7, 2026

**Copyright:** © 2026 Prashad et al. This is an open access article distributed under the terms of the [Creative Commons Attribution License](https://creativecommons.org/licenses/by/4.0/), which permits unrestricted use, distribution, and reproduction in any medium, provided the original author and source are credited.

**Data availability statement:** The data are available at: <https://doi.org/10.17605/OSF.IO/5JXMS>.

**Funding:** This investigation was supported in part by funds provided for medical and biological research by the State of Washington Initiative Measure No. 171. This work was also

## Abstract

Chronic cannabis use is associated with cognitive impairment, but its impact on implicit motor learning is unclear. Implicit learning of movement sequences (i.e., their specific ordinal and temporal structure) is vital for performing complex motor behavior and lays the foundation for performing daily activities and interacting socially. We collected data from 30 individuals who used cannabis regularly and 32 individuals who did not use cannabis. We utilized the serial reaction time task to assess implicit motor sequence learning and the Corsi block-tapping test to assess visuospatial short-term and working memory. We also recorded resting state electroencephalography (EEG) to measure resting cortical activity. While implicit motor learning was evident at the group level, longer cannabis use was associated with a smaller index of motor learning and increased activity in beta and gamma EEG frequencies during resting state. The cannabis group also had a significantly shorter Corsi span (in both forward and backward conditions). These findings indicate that longer chronic cannabis use is associated with impaired implicit motor learning that may be a function of increased resting state neural oscillatory activity, resulting in increased cortical noise, and reduced visuospatial short-term and working memory. These findings suggest that chronic cannabis use may disrupt corticostriatal pathways that underlie implicit motor sequence learning, indicating a more extensive effect of cannabis on the motor system.

## Introduction

Recreational cannabis is legal in 23 states in the United States and is widely used around the world [1]. Acute and chronic cannabis use is associated with impaired cognition, including attention and working memory [2–6]. These cognitive processes underlie motor learning [7–9], which involves combining actions into specific temporal

supported by the National Science Foundation under Grant # EEC-2127509 administered by the American Society for Engineering Education (ASEE). The funders had no role in study design, data collection and analysis, decision to publish, or preparation of the manuscript.

**Competing interests:** The authors have declared that no competing interests exist.

and ordinal structures that form complex motor behaviors critical for daily living. These behaviors include communicating with others, operating equipment and software (e.g., driving a car, using a computer), and engaging in activities that improve our health (e.g., physical activity, sports). Thus, motor learning is critical for human behavior throughout the lifespan.

Acute and chronic cannabis use may influence motor learning through movement pathways in the corticostriatal network that are modulated by dopamine. The D1 subtype of dopamine receptors modulates the direct pathway that facilitates movement, while the D2 subtype modulates the indirect pathway that inhibits movement. A careful balance between these pathways is required to perform the desired movement and suppress unnecessary or redundant movements. In addition to these movement pathways, dopamine also regulates the reward circuit from the ventral tegmental area to the nucleus accumbens and prefrontal cortex [10]. Dopamine pathways in the prefrontal cortex integrate rewarded motor behavior that leads to goal-directed actions [11]. Alterations in these pathways are associated with substance use, including cannabis, and are foundational to the development of substance use disorders [12]. For example, chronic cannabis use results in decreased dopamine synthesis in the striatum [13,14], which may impact movement pathways that connect through the striatum via dopamine projections. In addition, cannabis predominantly affects D1 receptors [15] and influences the binding of stimuli-response pairs [16] that are required for integrating task-related stimuli and appropriate motor responses. Furthermore, endogenous cannabinoids are naturally present throughout the brain and bind with cannabinoid type-1 (CB1) and cannabinoid type-2 (CB2) receptors. Animal studies demonstrate that CB1 receptors are most densely present in the basal ganglia, cerebellum, and hippocampus [17], can alter dopamine, GABA, and glutamate availability [18], and can regulate motor activity [19]. When delta-9-tetrahydrocannabinol (THC), the primary psychoactive ingredient in cannabis, interacts with these receptors, it can inhibit synaptic transmission [20]. Chronic cannabis use was found to reduce CB1 receptor availability in rats [21–24] and humans [25–27]. In rats, acute cannabis activated CB1 receptors in the cerebellum and resulted in impaired motor coordination [28,29]. These findings provide converging evidence that cannabis influences the motor system.

In addition, the effect of cannabis on dopamine and cannabinoid receptors may also alter resting cortical activity [30,31], which can then impact cognition [32]. Neural oscillations present during resting state (i.e., when an individual is awake, but not engaged in a task [33,34]) have both spatial and temporal synchrony [35,36]. This neural synchrony can be measured via electroencephalography (EEG), in which neural signals in different frequencies are associated with task-specific cognitive processes. For example, alpha frequencies (8–12 Hz) are synchronized (i.e., they are present with greater power) during resting state, while beta (13–30 Hz) and gamma (30 Hz and above) are synchronized when engaged in a task. Beta frequencies in particular are associated with motor processing [37,38] in the central and parietal areas of the cortex [39,40]. Typically, resting state measured via EEG consists of greater activity in the lower frequencies (i.e., delta, theta, and alpha) and reduced

activity in the higher frequencies (i.e., beta and gamma) due to the absence of engagement in a task [35]. Changes in these neural patterns may indicate disruptions in networks underlying cognition [32]. Prior studies have found that alterations in resting state EEG are associated with chronic cannabis use. For example, Prashad and colleagues reported that individuals who chronically used cannabis exhibited increased beta activity and decreased delta (0–4 Hz) and theta (4–7 Hz) activity during resting state compared to controls who did not use cannabis [41]. This altered resting state cortical activity suggests a failure to inhibit excessive cortical noise, which may disrupt cognitive and motor processes. In addition, Böcker and colleagues found greater resting state theta associated with impaired working memory after acute cannabis intoxication. They further demonstrated a dose-dependent effect of THC on beta frequencies, such that individuals who consumed larger doses of THC exhibited greater resting state beta power [42]. These findings indicate that cannabis can disrupt resting state neural oscillations that may be associated with cognitive impairment.

Building on evidence that chronic cannabis use may disrupt pathways involved in motor control and cognition, it is critical to examine whether these effects extend to implicit motor learning, which enables the acquisition and automation of activities of daily living. When these processes are compromised, individuals may struggle to learn new motor skills or adapt to novel situations, limiting their ability to interact effectively with tools, devices, and environments, and ultimately reducing independence. Elucidating the connection between cannabis use and implicit motor learning may inform public health strategies and policy. Moreover, since chronic cannabis is associated with alterations in brain activity [41,43,44], identifying neural patterns associated with motor learning impairment may yield critical insights into the mechanisms underlying cannabis-related deficits.

In this study, we examined the effect of chronic cannabis use on implicit motor sequence learning and resting state cortical activity. Implicit motor learning was assessed using the serial reaction time (SRT) task and cortical activity was measured during resting state with EEG. We also measured visuospatial short-term and working memory using the Corsi block-tapping test. We predicted that individuals with chronic cannabis use would exhibit increased resting state cortical activity (i.e., higher activity in the beta and gamma bands and less activity in the delta, theta, and alpha bands) compared to individuals who do not use cannabis. Moreover, we expected that increased years of chronic cannabis use would be associated with increased resting state cortical activity as well as larger declines in implicit motor learning. This prediction is based on prior research that indicates that longer duration of cannabis use is associated with greater neuropsychological decline [45]. Finally, consistent with the current literature [2,4], we expected that chronic cannabis use would be associated with shorter forward and backward Corsi spans (i.e., number of items in memory), indicating reduced visuospatial short-term and working memory, respectively.

## Materials and methods

### Participants

We recruited 72 participants from the Washington State University (Pullman, WA, USA) community between March 11, 2022 and April 29, 2023. Of these, five participants did not meet the inclusion criteria and five participants did not complete all sessions of the study. Of the remaining 62 participants, 30 participants used cannabis at least four times a week for at least one year (cannabis group; mean age =  $20.5 \pm 1.7$  years; 20 female participants) and 32 participants used cannabis 25 times or fewer in their lifetime (control group; mean age =  $20.7 \pm 3.0$  years; 23 female participants). We used GPower [46] to estimate the sample size for each group based on a *a priori* analysis using effect sizes reported in prior research that examined similar EEG outcomes in individuals who use cannabis [41]. We determined that a sample size of 30 participants in each group would be sufficient to detect an effect size of 0.6 with a power of 0.8 and alpha set at 0.05.

Participant demographic information is displayed in Table 1. Of the 32 participants in the control group, 16 reported never using cannabis, and the remaining 16 had used cannabis an average of  $4.7 \pm 7.4$  (range: 1–25) times in their lifetime. All participants were right-handed, proficient in English, did not have a history of neurological diagnoses, and provided their written informed consent. All procedures were approved by the Institutional Review Board at

**Table 1. Participant demographics (mean  $\pm$  SD).**

|                                    | Control Group   | Cannabis Group      | p-value  |
|------------------------------------|-----------------|---------------------|----------|
| N                                  | 32              | 30                  | —        |
| Age (years)                        | 20.7 $\pm$ 3.0  | 20.5 $\pm$ 1.7      | 0.77     |
| Gender (M/F)                       | 9/23            | 10/20               | 0.66     |
| Years of education                 | 14.4 $\pm$ 1.1  | 14.1 $\pm$ 0.37     | 0.14     |
| Cannabis use days in prior 30 days | 0.0 $\pm$ 0.0   | 25.4 $\pm$ 4.2      | < 0.001* |
| Years of cannabis use              | 0.0 $\pm$ 0.0   | 3.3 $\pm$ 1.6       | < 0.001* |
| Age at cannabis use onset (years)  | —               | 16.4 $\pm$ 2.1      | —        |
| Lifetime cannabis use              | 4.7 $\pm$ 7.4   | 2518.8 $\pm$ 2758.3 | < 0.001* |
| Grams of cannabis used per day     | —               | 2.3 $\pm$ 4.8       | —        |
| MPS                                | 1.0 $\pm$ 1.7   | 4.6 $\pm$ 3.5       | < 0.001* |
| CUDIT-R                            | 1.1 $\pm$ 1.6   | 14.1 $\pm$ 4.3      | < 0.001* |
| AUDIT                              | 3.8 $\pm$ 4.8   | 7.0 $\pm$ 4.9       | 0.010*   |
| FTND                               | 0.0 $\pm$ 0.0   | 0.0 $\pm$ 0.0       | n/a      |
| DASS-21                            | 10.5 $\pm$ 8.1  | 11.1 $\pm$ 9.3      | 0.81     |
| DASS-21 Depression score           | 3.8 $\pm$ 3.2   | 3.7 $\pm$ 3.8       | 0.99     |
| DASS-21 Anxiety score              | 2.7 $\pm$ 3.1   | 3.7 $\pm$ 3.4       | 0.21     |
| DASS-21 Stress score               | 4.1 $\pm$ 3.3   | 3.6 $\pm$ 3.7       | 0.58     |
| Cognitive Failures Questionnaire   | 59.4 $\pm$ 18.6 | 50.0 $\pm$ 23.0     | 0.081    |
| MCQ-SF (Session 2)                 | 18.7 $\pm$ 8.0  | 38.1 $\pm$ 13.3     | < 0.001* |
| MCQ-SF (Session 3)                 | 16.3 $\pm$ 6.8  | 34.8 $\pm$ 11.5     | < 0.001* |
| MoCA                               | 26.9 $\pm$ 2.2  | 27.2 $\pm$ 1.5      | 0.55     |

Abbreviations: M/F, male/female; MPS, Marijuana Problem Scale; CUDIT-R, Cannabis Use Disorder Identification Test-Revised; AUDIT, Alcohol Use Disorder Identification Test; FTND, Fagerström Test for Nicotine Dependence; DASS-21, Depression, Anxiety, and Stress Scale – 21 Items; MCQ-SF, Marijuana Craving Questionnaire-Short Form (not assessed in Session 1); MoCA, Montreal Cognitive Assessment.

<https://doi.org/10.1371/journal.pone.0338082.t001>

Washington State University. Participants were asked to use cannabis as was typical for them (i.e., to not abstain from cannabis use prior to any of the sessions) in order to assess chronic cannabis use during typical consumption. Participants received Amazon gift cards of \$10, \$20, and \$30 for completing the first, second, and third sessions, respectively.

## Procedures

The three sessions were completed within approximately one week. In the first session (45 minutes), participants completed surveys about handedness, cannabis use, alcohol use, cigarette use, anxiety, stress, mood, and cognitive function. We assessed handedness using the Edinburgh Handedness Inventory – Short Form [47,48]. To assess cannabis use, we measured: 1) frequency and quantity of use with the Daily Sessions, Frequency, Age of Onset, and Quantity of Cannabis Use Inventory (DFAQ-CU [49]), 2) cannabis dependence using the Cannabis Use Disorder Identification Test-Revised (CUDIT-R [50]), and 3) the impact of cannabis use on different aspects of daily life using the Marijuana Problem Scale (MPS [51]). We also assessed alcohol and nicotine dependence using the Alcohol Use Disorder Identification Test (AUDIT [52]) and the Fagerström Test for Nicotine Dependence (FTND [53]), respectively. To assess anxiety, mood, and stress, we used the Depression, Anxiety, and Stress Scale-21 Items (DASS-21 [54]). Lastly, we assessed self-reported cognitive impairment with the Cognitive Failures Questionnaire (CFQ [55]). We also used the Procrastination Scale [56] to assess chronic procrastination and the Need for Cognition Scale [57] to assess the tendency to enjoy effortful cognitive tasks that are reported elsewhere [58].

In the second session (90 minutes), we assessed subjective craving using the Marijuana Craving Questionnaire-Short Form (MCQ-SF [59]) following which participants performed two tasks: 1) the serial reaction time (SRT) task [60] to assess implicit motor sequence learning and 2) the Corsi block-tapping test [61] to assess visuospatial short-term and working memory. The SRT task was followed by the NASA Task Load Index (NASA-TLX [62]) to assess the amount of perceived mental and physical demand during the SRT task. Participants also completed the AX-Continuous Performance Test [63] to assess cognitive control and a transport task [64] to assess sensitivity to physical and cognitive load during decision making that are reported elsewhere [58].

In the SRT task, participants responded when a stimulus appeared in one of four squares presented in a horizontal array in the center of the computer screen. Responses were made on a QWERTY keyboard. Participants responded to each stimulus by pressing the key that spatially corresponded to the stimulus location as quickly and accurately as possible (see Fig 1A). Participants pressed the “D” key using their left middle finger for the left-most location, “F” using their left index finger for the second location, “J” using their right index finger for the third location, and “K” using their right middle finger for the right-most location. The stimulus appeared for 500 ms, and the response-to-stimulus interval was randomly selected between 500–1000 ms. The task consisted of eight blocks with 120 trials each. In the first block (B0), stimuli appeared in a random order to assess baseline reaction time (RT). In Blocks 1–4 (B1–B4), stimuli appeared in a specific sequential order consisting of 12 items that repeated 10 times in each block. In Block 5 (B5), stimuli appeared in a random

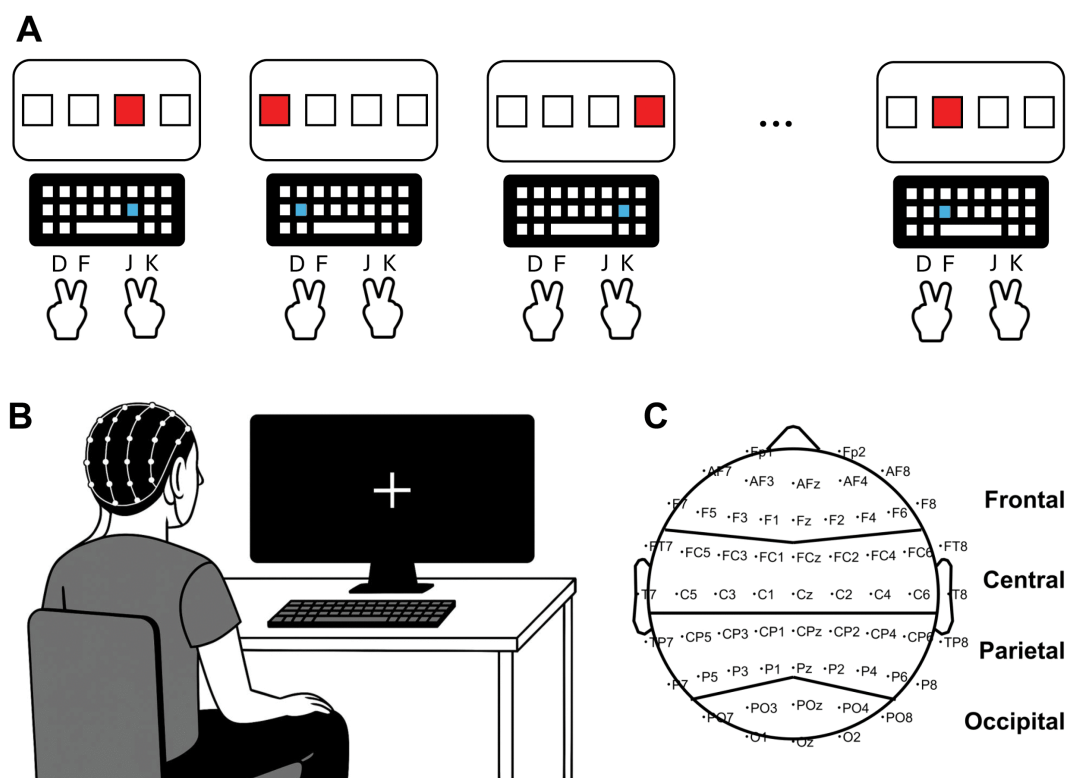

**Fig 1. Experimental setup.** **A)** In the serial reaction time (SRT) task, when one of the four squares on the screen turned red, the participant immediately pressed the spatially corresponding key as quickly and accurately as possible. Participants placed their fingers on the “D” (left middle finger), “F” (left index finger), “J” (right index finger), and “K” (right middle finger). **B)** Resting state EEG activity was recorded while participants had their eyes closed. **C)** The scalp montage depicts the arrangement of the 64 electrodes according to the international 10-20 system and the definition of the four cortical regions (i.e., frontal, central, parietal, and occipital regions).

<https://doi.org/10.1371/journal.pone.0338082.g001>



order. In Block 6 (B6), stimuli appeared in the same sequence as B1–B4. This task assesses implicit motor sequence learning as participants were not informed that stimuli often appeared in the same sequence [60].

In the Corsi block-tapping test, participants were presented with squares in different locations on the computer screen. In each trial, stimuli appeared in these squares in a specific order. In the forward condition, participants were instructed to click the squares in the same order. In the backward condition, participants were instructed to click the squares in the reverse order. The Corsi span score represented the largest number of items participants were able to remember in the forward condition (i.e., short-term memory) and the backward condition (i.e., working memory). The SRT task and the Corsi block-tapping test were presented using Presentation software (Neurobehavioral Systems Inc., Berkeley, CA).

Finally, in the third session (75 minutes), we assessed subjective craving again using the MCQ-SF and global cognition using the Montreal Cognitive Assessment (MoCA [65]). Afterward, we recorded eyes closed resting state EEG from each participant (see Fig 1B) with a 64-electrode ActiCap with BrainAmp amplifier (Brain Products GmbH, Gilching, Germany) with electrodes arranged according to the international 10–20 system (see Fig 1C). We used a sampling frequency of 1000 Hz and referenced to the sensor on the left earlobe. Channel impedances were below 7 k $\Omega$ . We collected three trials of two minutes each and instructed participants to close their eyes, relax, and try not to think about anything in particular.

## EEG analysis

We first processed the EEG to reduce the presence of artifacts. To reduce longitudinal drift, EEG data were high-pass filtered with a 4<sup>th</sup>-order zero-phase Butterworth filter at a cutoff frequency of 0.1 Hz. Brief deflections in the EEG signals, caused by sudden head movements, were reduced with artifact subspace reconstruction [66,67]. This technique removes reconstructed artifacts from time windows that contain unusually high variances in amplitude. We used a time window length of 0.5 seconds and removed artifacts from time windows that had a variance beyond 60 standard deviations compared to other data that had no deflections. Next, we removed artifacts associated with ocular, muscular, and power line activity with Independent Component Analysis (ICA) and the “ICLabel” functions [68] in the EEGLAB toolbox [69]. ICA decomposes the EEG signals into statistically independent components [70] while ICLabel automatically classifies which components are artifacts based on a large freely available database [68,71].

Then, we extracted the amount of brain wave activity as the estimated spectral power from the EEG recordings. First, we re-referenced the EEG to the common average reference. Next, we extracted the 90-second epoch that began 15 seconds after the participant was given the cue to close their eyes. Next, the linear trend from the epoch was removed to reduce spectral leakage. The Welch method was used to calculate the power spectral density (PSD), which estimates the PSD based on the average Fast Fourier Transform (FFT) solution from split segments from the epoch. The FFT was calculated in 10-second segments with a 5-second overlap, each of which was multiplied by a Hamming window using an FFT length of 8192 samples [72]. From the PSD, we extracted power from five frequency bands: delta (<4 Hz), theta (4–8 Hz), alpha (8–13 Hz), beta (13–30 Hz), and gamma (30–50 Hz). We calculated relative spectral power as a percentage of the total power (1–50 Hz) for each frequency band and grouped the EEG sensors into four regions that corresponded to major cortical areas (i.e., frontal [FP1, FP2, AF3, AFz, AF4, AF7, AF8, F1, Fz, F2, F3, F4, F5, F6, F7, and F8], central [FC1, FCz, FC2, FC3, FC4, FC5, FC6, FT7, FT8, C1, Cz, C2, C3, C4, C5, C6, T7, and T8], parietal [CP1, CPz, CP2, CP3, CP4, CP5, CP6, TP7, TP8, P1, Pz, P2, P3, P4, P5, P6, P7, and P8], and occipital [PO3, Poz, PO4, PO7, PO8, O1, Oz, and O2] regions; see Fig 1C).

## Statistical analyses

To evaluate differences in implicit motor learning, we calculated mean RTs for each block in the SRT task. We excluded incorrect responses and RTs that were greater or less than 2.5 standard deviations from each participant's mean from the analysis [73,74]. We conducted a mixed factorial analysis of variance (ANOVA) on RT with Group (control, cannabis) as

the between-subjects factor and Block (B0-6) as the within-subjects factor. If implicit learning occurred in this task, RTs should significantly decrease in the last learning block (i.e., B4) compared to the first learning block (i.e., B1) as participants learned the sequence and could respond faster by anticipating the response to the upcoming stimulus before it appeared [75,76]. Since B5 contained randomly ordered stimuli, mean RTs should significantly increase in B5 compared to B4 as participants could no longer anticipate the next stimulus. The index of motor learning [77] is quantified as an increase in RT in response to random stimuli (B5) compared to the sequenced stimuli (B4). We also expected sequenced stimuli in B6 to show significantly decreased RT compared to random stimuli in B5.

To assess differences in short-term and working memory, we performed independent *t*-tests on the forward and backward Corsi span, respectively.

To assess differences in resting state EEG, we conducted a 2 x 4 mixed-design ANOVA with the between-subjects factor of Group (control, cannabis) and the within-subject factor of Region (frontal, central, parietal, and occipital) on relative spectral power for each frequency band.

We also calculated Pearson's correlations between variables related to cannabis use (i.e., CUDIT-R, MPS, MCQ-Session 2, MCQ-Session 3, cannabis use in the prior 30 days, years of cannabis use, age at onset of cannabis use, and lifetime cannabis use) and mood, anxiety, stress, cognition, index of motor learning from the SRT task, forward and backward Corsi span, and spectral power of cortical EEG activity in the cannabis group.

For all analyses, we used Bonferroni *post hoc* tests to account for multiple comparisons in significant effects. Any significant differences between groups on other variables such as age, education, alcohol use, or nicotine use, were included as covariates in the analyses. Statistical significance was defined at  $p < 0.05$ . We analyzed the data using custom scripts in MATLAB (MathWorks, Natick, MA) and SPSS (IBM, Armonk, NY).

## Results

### Demographics, cognitive-emotional assessments, and cannabis use measures

Differences in demographic, cognitive-emotional assessments, and cannabis use measures for the two groups are reported in Table 1. There were no significant differences between the groups in age [ $t(60) = 0.30$ ,  $p = 0.77$ ,  $d = 0.082$ ], gender [ $t(60) = -0.44$ ,  $p = 0.66$ ,  $d = 0.14$ ], education [ $t(60) = 1.5$ ,  $p = 0.14$ ,  $d = 0.37$ ], or nicotine use (no participants reported nicotine use). The cannabis group reported significantly higher alcohol use [ $t(60) = -2.7$ ,  $p = 0.010$ ,  $d = 0.66$ ] compared to the control group, so alcohol use was included as a covariate in subsequent analyses. For cognitive-emotional assessments, there were no differences in self-reported anxiety [ $t(60) = -1.3$ ,  $p = 0.21$ ,  $d = 0.31$ ], mood [ $t(60) = 0.019$ ,  $p = 0.99$ ,  $d = 0.028$ ], or stress [ $t(60) = 0.56$ ,  $p = 0.58$ ,  $d = 0.14$ ]. There were also no differences in global cognition [ $t(60) = -0.61$ ,  $p = 0.55$ ,  $d = 0.16$ ] or self-reported cognitive impairment [ $t(60) = 1.8$ ,  $p = 0.081$ ,  $d = 0.45$ ].

The cannabis group used cannabis on significantly more days in the prior 30 days [ $t(60) = -40.8$ ,  $p < 0.001$ ,  $d = 8.6$ ], for significantly more years [ $t(60) = -11.6$ ,  $p < 0.001$ ,  $d = 2.9$ ], and had significantly greater lifetime cannabis use [ $t(60) = -5.2$ ,  $p < 0.001$ ,  $d = 1.3$ ] compared to the control group. In addition, the cannabis group had higher MPS [ $t(60) = -5.2$ ,  $p = 0.001$ ,  $d = 1.3$ ] and CUDIT-R [ $t(60) = -16.1$ ,  $p < 0.001$ ,  $d = 4.0$ ] scores than the control group. Moreover, the cannabis group had significantly higher MCQ-SF scores compared to the control group [Session 2,  $t(60) = -7.0$ ,  $p < 0.001$ ,  $d = 1.8$  and Session 3,  $t(60) = -7.8$ ,  $p < 0.001$ ,  $d = 2.0$ ; the MCQ-SF was not collected in the first session].

Within the cannabis group, 10 reported using a water pipe, six reported using joints, six reported using a vaporizer, three reported using a hand pipe, another three reported using edibles, one used blunts, and one used a nectar collector. In terms of THC content, four participants reported using cannabis with an average THC content of greater than 30%, five reported using 25–30%, 12 reported using 20–24%, three reported using 15–19%, one reported using 10–14%, and five reported that they did not know. There was a significant positive partial correlation (controlled for alcohol use) between the MPS score and anxiety ( $r = 0.30$ ,  $p = 0.047$ ) as well as self-reported cognitive impairment ( $r = 0.30$ ,  $p = 0.043$ ) in the

cannabis group. In addition, age at onset of cannabis use was positively partially correlated with global cognition ( $r=0.37$ ,  $p=0.013$ ). Other correlations are included in [S1 Table](#) in the supplemental materials.

## Implicit motor learning

As we found significantly higher alcohol use in the cannabis group, we included the AUDIT score as a covariate and conducted a mixed factorial ANCOVA on RT from the SRT task. We found a main effect of Block,  $F(6,354) = 22.7$ ,  $p<0.001$ , partial  $\eta^2=0.28$ , but no main effect of Group,  $F(1,59) = 0.13$ ,  $p=0.72$ , partial  $\eta^2=0.002$  or AUDIT score,  $F(1,59) = 0.23$ ,  $p=0.63$ , partial  $\eta^2=0.004$ . There were also no significant interactions between Block and Group,  $F(6,354) = 0.41$ ,  $p=0.88$ , partial  $\eta^2=0.007$  or Block and AUDIT score,  $F(6,354) = 0.92$ ,  $p=0.48$ , partial  $\eta^2=0.015$ . [Fig 2A](#) shows mean RTs for each block of the SRT task for both groups. *Post hoc* analyses corrected for multiple comparisons revealed a significant decrease in RT from B1 to B4 for both groups (control group,  $p=0.001$ ,  $d=0.79$ ; cannabis group,  $p<0.001$ ,  $d=0.88$ ), a significant increase in B5 compared to B4 (i.e., index of motor learning, control group,  $p<0.001$ ,  $d=1.1$ ; cannabis group,  $p=0.008$ ,  $d=0.76$ ), and a significant decrease from B5 to B6 (control group,  $p<0.001$ ,  $d=1.3$ ; cannabis group,  $p<0.001$ ,  $d=0.96$ ).

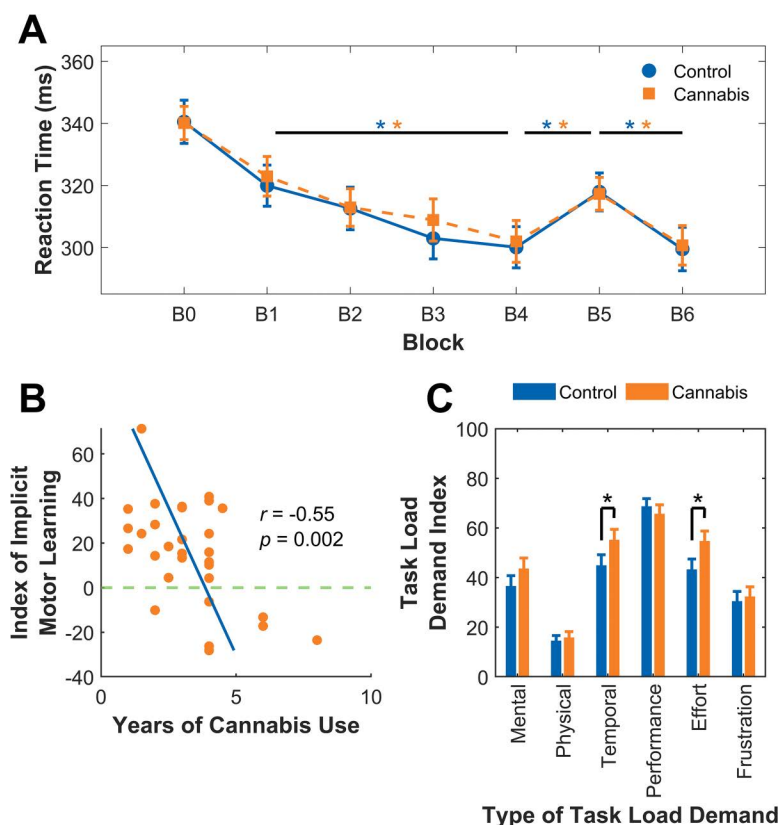

**Fig 2. Implicit motor learning.** **A)** Mean reaction times for correct responses in each block for the control group and the cannabis group in the serial reaction time (SRT) task. **B)** Individuals with more years of cannabis use showed a smaller index of implicit motor learning in the SRT task. The index of implicit motor learning in the SRT task is the difference in reaction time between Block 5 and Block 4 (i.e., a greater positive difference indicates a greater amount of learning, while a negative difference indicates no learning). The horizontal line at 0 represents a 0 ms difference between these blocks. **C)** The cannabis group reported feeling significantly greater temporal demand (i.e., feeling more rushed) and exerting greater effort compared to the control group when performing the SRT task. Higher task load demand index scores represent subjective reports of higher demand. The performance task load was reverse coded to match the other types of task load. Error bars indicate standard error. \*Significance level of  $p<0.05$ .

<https://doi.org/10.1371/journal.pone.0338082.g002>



While there were no significant differences between the groups in the SRT task (see Fig 2A), there was a significant negative partial correlation between years of cannabis use and the index of motor learning ( $r = -0.55$ ,  $p = 0.002$ ) in the cannabis group, shown in Fig 2B.

To evaluate perceived mental and physical demand of the SRT task, we compared ratings on the NASA-Task Load Index, shown in Fig 2C. The cannabis group reported exerting significantly greater effort [ $t(60) = -2.0$ ,  $p = 0.025$ ,  $d = 4.8$ ] and feeling more rushed [ $t(60) = -1.7$ ,  $p = 0.046$ ,  $d = 5.0$ ] during the task compared to the control group. There were no significant differences in perceived mental demand [ $t(60) = -1.2$ ,  $p = 0.12$ ,  $d = 4.9$ ], physical demand [ $t(60) = -0.42$ ,  $p = 0.34$ ,  $d = 2.5$ ], successful performance [ $t(60) = -0.64$ ,  $p = 0.26$ ,  $d = 3.9$ ], or frustration [ $t(60) = -0.34$ ,  $p = 0.37$ ,  $d = 4.5$ ] between groups.

### Resting state EEG

In the delta, theta, alpha, and beta bands, there was a significant main effect of Region [delta,  $F(3,177) = 103.0$ ,  $p < 0.001$ , partial  $\eta^2 = 0.64$ ; theta,  $F(3,177) = 14.3$ ,  $p < 0.001$ , partial  $\eta^2 = 0.20$ ; alpha,  $F(3,177) = 81.8$ ,  $p < 0.001$ , partial  $\eta^2 = 0.58$ ; beta,  $F(3,177) = 12.8$ ,  $p < 0.001$ , partial  $\eta^2 = 0.18$ ], but no significant main effect of Group and no significant interactions. Relative spectral power scalp maps for each frequency band for both groups are depicted in Fig 3. In the gamma band, there were no significant main effects, but there was a significant interaction between Region x Group,  $F(3,177) = 4.2$ ,  $p = 0.007$ , partial  $\eta^2 = 0.066$ . *Post hoc* analyses indicated no significant differences between regions in the control group, but in the cannabis group, there was significantly higher gamma power in the central region compared to the frontal ( $p < 0.001$ ,  $d = 1.3$ ), parietal ( $p < 0.001$ ,  $d = 1.1$ ), and occipital ( $p = 0.004$ ,  $d = 1.2$ ) regions.

We predicted that the cannabis group would exhibit supranormal EEG spectral power (i.e., greater spectral power in the beta and gamma bands and less spectral power in the delta, theta, and alpha bands), but we did not find group level differences. However, within the cannabis group, we found significant correlations between cannabis use measures and beta, gamma, and delta frequencies (see Fig 4). Specifically, age at onset of cannabis use was negatively partially correlated with beta activity in the central ( $r = -0.43$ ,  $p = 0.014$ ) regions. In addition, cannabis use in the prior 30 days was positively partially correlated with gamma activity in the frontal ( $r = 0.62$ ,  $p < 0.001$ ), central ( $r = 0.43$ ,  $p = 0.019$ ), and occipital

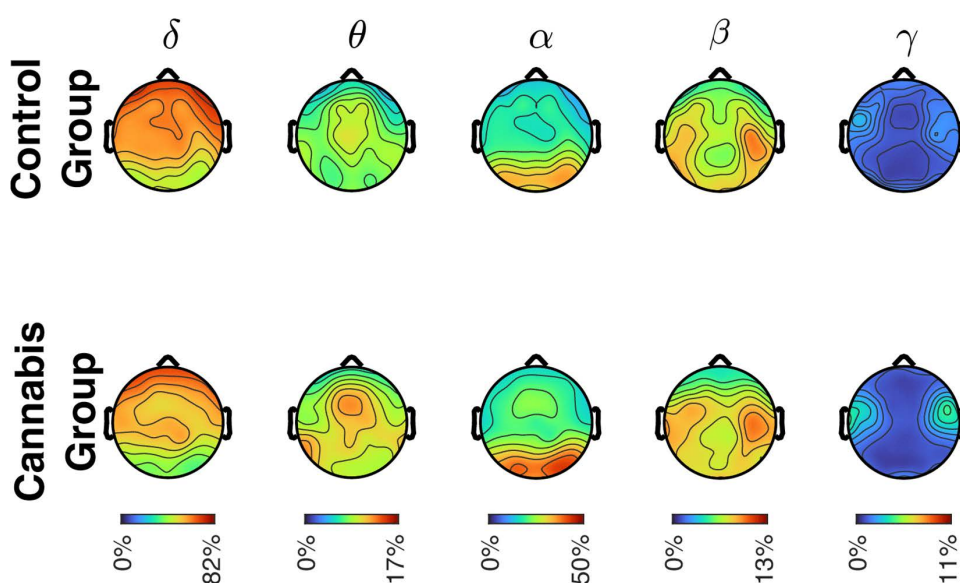

**Fig 3. Scalp map depicting relative spectral power for each frequency band for the control and cannabis groups.** There were no significant differences between the groups for any frequency band. Colors represent high (red) or low (blue) spectral power.

<https://doi.org/10.1371/journal.pone.0338082.g003>

( $r=0.48$ ,  $p=0.008$ ) regions. Finally, subjective craving assessed during the third session was negatively partially correlated with delta activity in the parietal ( $r=-0.37$ ,  $p=0.049$ ) and occipital ( $r=-0.38$ ,  $p=0.041$ ) regions, positively partially correlated with beta activity in the frontal region ( $r=0.48$ ,  $p=0.007$ ), and positively partially correlated with gamma activity in the frontal ( $r=0.45$ ,  $p=0.014$ ) and occipital ( $r=0.51$ ,  $p=0.005$ ) regions. A subset of the above correlations are depicted in Fig 4 and the remaining are in the supplementary materials (S2 Fig).

### Corsi block-tapping test

The cannabis group had a significantly shorter forward (i.e., visuospatial short-term memory,  $t(60) = 2.5$ ,  $p=0.017$ ,  $d=1.2$ ) and backward (i.e., visuospatial working memory,  $t(60) = 2.9$ ,  $p=0.006$ ,  $d=1.5$ ) spans compared to the control group (see Fig 5). Additionally, subjective craving assessed in the second session was negatively partially correlated with the backward Corsi span ( $r=-0.37$ ,  $p=0.049$ ) in the cannabis group.

### Discussion

We examined the effect of chronic cannabis use on implicit motor learning, resting state cortical EEG activity, and visuospatial short-term and working memory. Our results indicate that more years of cannabis use was associated with a smaller index of implicit motor learning, younger age at onset of use was associated with increased beta oscillations, increased past month use was associated with increased gamma oscillations, and higher subjective craving was associated with decreased delta oscillations. In addition, we found significantly reduced visuospatial short-term and working memory spans in the cannabis group. Finally, the cannabis group reported exerting greater effort during the implicit motor learning task, which may have contributed to their performance being comparable to the control group and greater effort may have been necessary to compensate for their increased resting state cortical EEG activity. These findings suggest that supranormal resting state EEG activity may increase cortical noise, interfere with visuospatial short-term and working memory, and affect implicit motor learning such that greater effort is required for motor performance to be comparable to the control group.

### Implicit motor learning was impaired in individuals with longer chronic cannabis use

We found intact implicit motor learning in the cannabis group which was no different than the control group. However, the cannabis group reported that they exerted significantly greater effort and felt more rushed while performing the SRT

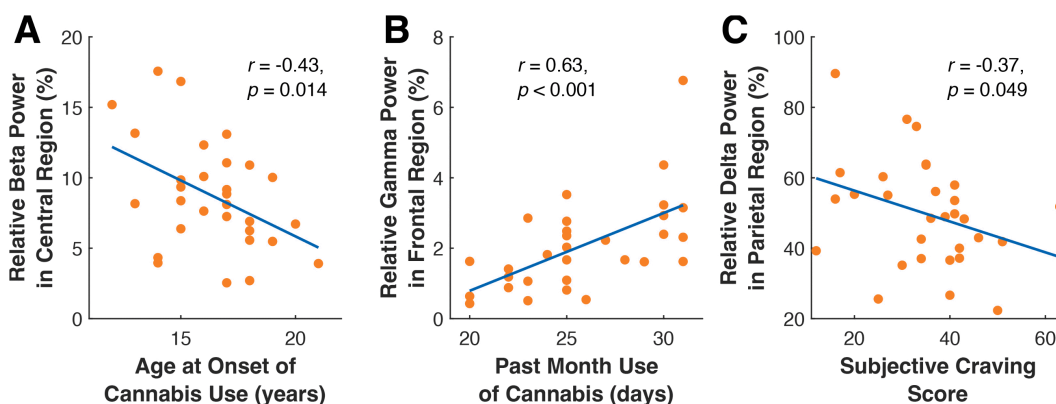

**Fig 4. Correlation between cannabis use measures and spectral power of cortical EEG activity.** A) Higher beta activity in the central region was associated with an earlier age of onset of cannabis use. B) Higher gamma activity in the frontal (shown), central (not shown), and occipital (not shown) regions was associated with higher cannabis use in the prior 30 days. C) Lower delta activity in the parietal (shown) and occipital (not shown) regions was associated with higher subjective craving of cannabis (measured via the Marijuana Craving Questionnaire-Short Form; MCQ-SF).

<https://doi.org/10.1371/journal.pone.0338082.g004>

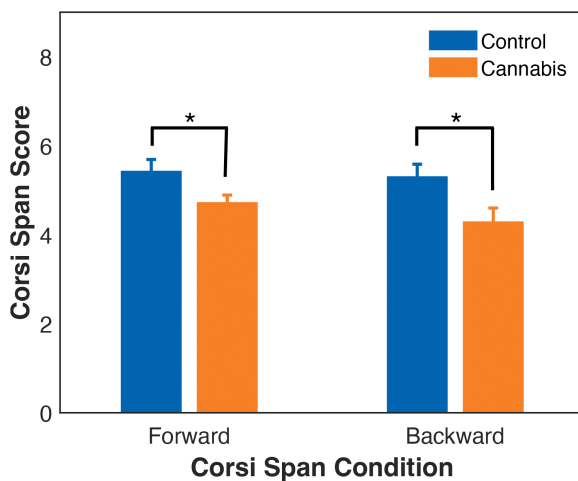

**Fig 5. Memory span in the control and cannabis groups measured by the Corsi block-tapping test.** The cannabis group had significantly lower Corsi span scores in both the forward (i.e., visuospatial short-term memory) and backward (i.e., visuospatial working memory) conditions. \*Significance level of  $p < 0.05$ .

<https://doi.org/10.1371/journal.pone.0338082.g005>

task. Feeling more rushed may be a consequence of the greater effort exerted during the task. This greater effort may have been necessary for the cannabis group to perform at a level that was comparable to that of the control group. While the amotivation syndrome hypothesis [78,79] suggests that acute cannabis use causes apathy [80,81], recent studies found that individuals who use cannabis chronically may be more willing to exert more effort to improve performance [58,81–87]. Although we did not find group-level differences in implicit motor learning, there were individual differences within the cannabis group. Specifically, a smaller index of implicit motor learning was associated with longer chronic cannabis use, indicating a potential link to reduced implicit motor learning in these individuals. This finding, together with the increased resting state beta activity that was associated with an earlier onset of cannabis use, suggests that longer chronic cannabis use may impact the corticostriatal pathway that plays a critical role in motor learning [88,89]. These results complement recent evidence demonstrating that chronic cannabis use impairs visuomotor adaptation (i.e., successful application of previously well-learned motor skills to new contexts) [90,91]. However, motor adaptation relies on the corticocerebellar circuit, whereas implicit motor sequence learning relies on the corticostriatal circuit [88]. Our novel finding suggests that the corticostriatal pathway may also be impaired by longer chronic cannabis use, advocating a more widespread impact of chronic cannabis use on the motor system. To fully understand how cannabis affects implicit motor learning, future studies may systematically explore the distinct effects of acute versus chronic use. Importantly, implicit motor learning is essential for acquiring and automating motor skills that we perform in our daily lives, such as using new tools and technologies, navigating unfamiliar environments, and adapting to changing task demands. When these processes are impaired, individuals may struggle to learn new motor skills or adapt to novel situations, particularly when stressed, distracted, or fatigued. This, in turn, can restrict performance, compromise daily functioning, threaten safety, and jeopardize independence.

### Supranormal resting state EEG may underlie implicit motor learning impairment

We found that within the cannabis group, cannabis use measures were correlated with supranormal resting state neural oscillations. Specifically, a younger age of onset of cannabis use was associated with higher beta activity, and higher use of cannabis in the prior 30 days was associated with higher gamma activity. The shift in cortical activity may be due to the interaction between THC and CB1 receptors that can modulate the balance between excitatory and inhibitory postsynaptic

activity and regulate local cortical excitability [92]. Specific to gamma activity, THC exposure can decrease the release of GABA in the prefrontal cortex and disrupt cortical gamma activity in adolescents [93]. Furthermore, another study reported that individuals who use cannabis chronically exhibited increased resting state beta activity [41], which is also consistent with our results. Tempel and colleagues found that when retrieving motor sequences from memory, increased beta power predicted motor forgetting [94]. Importantly, we found increased beta activity in the central areas, which are critical for motor control [95–97]. While our results only reflect changes in resting state, the effect cannabis use has on resting beta activity should be considered in future studies that examine task-related activity.

Our finding of supranormal cortical EEG activity during resting state may reflect increased cortical noise in the resting functional organization of the brain. Earlier studies have found that increased cortical noise during the baseline period before stimulus presentation in an oddball task was associated with acute THC use in individuals who abstained from cannabis for an average of  $445.7 \pm 846.6$  days [98] and in individuals who abstained from cannabis 12 hours prior to the session [99]. Thus, these earlier studies have demonstrated that acute THC exposure after abstinence alters cortical activity. Our findings extend this evidence by suggesting that increased cortical noise may also occur with chronic cannabis use without abstinence. It is unclear whether these effects persist with abstinence from cannabis or if they endure long-term. Future studies may consider a longitudinal approach to understand the directionality of these effects and parse whether short-term or long-term abstinence allows for recovery of motor learning.

### Lower visuospatial short-term and working memory capacity in the cannabis group

A critical aspect of motor learning is the ordering of action sequences; this acquisition requires short-term and working memory to combine individual actions into complex motor behavior [8]. Visuospatial working memory, in particular, is critical for optimum motor control [100] and is positively correlated with the rate of motor learning [101]. We found that individuals in the cannabis group had significantly reduced forward and backward Corsi spans compared to those in the control group, suggesting that cannabis use was associated with reduced visuospatial short-term and working memory. This finding is consistent with prior studies reporting that more frequent cannabis use was associated with poorer working memory and reduced hippocampal volume [102]. Furthermore, animal studies have directly demonstrated the impact of THC on spatial working memory. Rats given THC exhibited dose-dependent impaired short-term and working memory in a water maze task [103,104]. In addition, D1 receptors in the prefrontal cortex are involved in working memory and are stimulated by cannabis [15,105]. When D1 receptors were activated at a higher level than is typical, spatial working memory was impaired in rhesus monkeys [106] and rodents [107]. This evidence is consistent with our findings that there was significantly reduced visuospatial short-term and working memory in the cannabis group. In addition, the reduced visuospatial memory capacity in the cannabis group may have contributed to their need for greater effort during the SRT task compared to the control group.

### Limitations and future directions

Our results must be interpreted within the limitations of the current study. Our primary conclusions are based on correlations between cannabis use measures, index of motor learning, and resting state cortical EEG activity. While these provide a basis for the effect of cannabis, further research is needed to draw causal conclusions. For example, future studies may assess whether there are group differences between individuals who used cannabis for a greater number of years compared to those who used cannabis for fewer years. We also asked participants to use cannabis as they normally would to capture their typical daily functioning, rather than during an imposed abstinence period. While this approach preserved ecological validity, it also confounded the effects of acute and chronic use. However, including an abstinence period may increase the level of craving and withdrawal which may impact implicit motor learning and resting state cortical activity. Furthermore, previous studies have reported that anxiety tends to increase during abstinence from cannabis,

particularly within the first 24 hours [108–113]. Since heightened anxiety can impair cognitive function [114–116], it may confound interpretations of the effects of chronic cannabis use. Nevertheless, it is important for future studies to explore the differences between acute and chronic effects on implicit motor learning to better understand the nuanced impact of cannabis. In addition, we did not control the amount of cannabis use beyond the inclusion criterion of at least four uses per week for at least one year. Consequently, variability in consumption patterns may have influenced the findings. Future research may examine the impact of dosage and product variability (e.g., THC concentrations, forms of consumption) to better understand their impact on implicit motor learning and resting state EEG activity.

Our EEG analysis focused on relative spectral power to directly measure neural oscillatory activity and to assess differences in the distribution of this oscillatory activity across different frequencies. Future studies could utilize source localization techniques (e.g., standardized low resolution brain electromagnetic tomography (sLORETA [117], dipole source localization [118], and beamforming [119]) to help identify cortical origins of EEG signals and provide insight into how specific cortical areas may be affected by cannabis use. In addition, techniques such as functional connectivity could be used to assess interhemispheric communication and global brain connectivity [120] which may elucidate how cannabis use alters cortico-cortical communication between regions, particularly those involved in motor control and working memory, including the prefrontal cortex, primary motor cortex, premotor cortex, supplementary motor area, and parietal regions.

Finally, both groups in our sample contained a large proportion of female participants. As prior studies have indicated sex-related differences in neural and behavioral responses to cannabis [121–123], future studies may explore whether these differences impact implicit motor learning and resting state cortical activity.

## Conclusions

We found that longer chronic cannabis use was associated with impaired implicit motor learning. Furthermore, the cannabis group exhibited significantly lower visuospatial short-term and working memory compared to the control group. Such functional impairments may be associated with altered resting state neural oscillations we observed in this study. We found that an earlier age of onset of use was associated with increased resting state beta activity, greater use in the prior month was associated with increased resting state gamma activity, and a higher subjective craving was associated with decreased resting state delta activity. We suggest that the increase in resting state neural oscillations may reflect increased cortical noise that may disrupt cognitive and motor processing. Collectively, these findings suggest that longer chronic cannabis use may affect the corticostriatal network, which plays an important role in implicit motor learning, revealing a more widespread impact of chronic cannabis use on the motor system. Our findings highlight the complex nature of the effect of chronic cannabis use on cortical activity, cognition, and implicit motor learning with important considerations for understanding the full impact of cannabis on brain health, instrumental activities of daily living, and the consequent impact on public health.

## Supporting information

**S1 Table. Partial correlations (controlled for alcohol use) between variables related to cannabis use and cognitive-emotional assessments, the serial reaction time (SRT) task, the Corsi block-tapping task, and spectral power in the cannabis group.**

(DOCX)

**S2 Fig. Correlation between cannabis use measures and spectral power of cortical EEG activity (in additional regions not shown in figure in manuscript).** Higher gamma activity in the A) central and B) occipital regions was associated with higher cannabis use in the prior 30 days. C) Lower delta activity in the occipital region was associated with higher subjective craving of cannabis (measured via the Marijuana Craving Questionnaire-Short Form; MCQ-SF). D)



Higher beta activity in the frontal region was also associated with higher subjective craving. Higher gamma activity in the E) frontal and F) occipital regions was associated with higher subjective craving as well.  
(TIF)

## Author contributions

**Conceptualization:** Shikha Prashad, Lisa R. Fournier.

**Data curation:** Shikha Prashad, Lisa R. Fournier.

**Formal analysis:** Shikha Prashad, Andrew Y. Paek, Lisa R. Fournier.

**Funding acquisition:** Shikha Prashad, Andrew Y. Paek.

**Investigation:** Shikha Prashad, Andrew Y. Paek, Lisa R. Fournier.

**Methodology:** Shikha Prashad, Andrew Y. Paek, Lisa R. Fournier.

**Project administration:** Shikha Prashad, Lisa R. Fournier.

**Resources:** Shikha Prashad, Lisa R. Fournier.

**Supervision:** Shikha Prashad, Lisa R. Fournier.

**Validation:** Shikha Prashad, Lisa R. Fournier.

**Visualization:** Shikha Prashad.

**Writing – original draft:** Shikha Prashad.

**Writing – review & editing:** Shikha Prashad, Andrew Y. Paek, Lisa R. Fournier.

## References

1. UNODC. World Drug Report 2023. United Nations Office on Drugs and Crime. 2023.
2. Curran HV, Freeman TP, Mokrysz C, Lewis DA, Morgan CJA, Parsons LH. Keep off the grass? Cannabis, cognition and addiction. *Nat Rev Neurosci*. 2016;17(5):293–306. <https://doi.org/10.1038/nrn.2016.28> PMID: 27052382
3. Kroon E, Kuhns L, Cousijn J. The short-term and long-term effects of cannabis on cognition: recent advances in the field. *Curr Opin Psychol*. 2021;38:49–55. <https://doi.org/10.1016/j.copsyc.2020.07.005> PMID: 32823178
4. Volkow ND, Swanson JM, Evins AE, DeLisi LE, Meier MH, Gonzalez R. Effects of cannabis use on human behavior, including cognition, motivation, and psychosis: a review. *JAMA Psychiatry*. 2016;73:292.
5. Broyd SJ, van Hell HH, Beale C, Yücel M, Solowij N. Acute and Chronic Effects of Cannabinoids on Human Cognition-A Systematic Review. *Biol Psychiatry*. 2016;79(7):557–67. <https://doi.org/10.1016/j.biopsych.2015.12.002> PMID: 26858214
6. Grant JE, Chamberlain SR, Schreiber L, Odlaug BL. Neuropsychological deficits associated with cannabis use in young adults. *Drug Alcohol Depend*. 2012;121(1–2):159–62. <https://doi.org/10.1016/j.drugalcdep.2011.08.015> PMID: 21920674
7. Salthouse TA. Trajectories of normal cognitive aging. *Psychol Aging*. 2019;34(1):17–24. <https://doi.org/10.1037/pag0000288> PMID: 30211596
8. Seidler RD, Bo J, Anguera JA. Neurocognitive contributions to motor skill learning: the role of working memory. *J Mot Behav*. 2012;44(6):445–53. <https://doi.org/10.1080/00222895.2012.672348> PMID: 23237467
9. Song J-H. The role of attention in motor control and learning. *Curr Opin Psychol*. 2019;29:261–5. <https://doi.org/10.1016/j.copsyc.2019.08.002> PMID: 31491612
10. Hyman SE, Malenka RC, Nestler EJ. Neural mechanisms of addiction: the role of reward-related learning and memory. *Annu Rev Neurosci*. 2006;29:565–98. <https://doi.org/10.1146/annurev.neuro.29.051605.113009> PMID: 16776597
11. Matsumoto K, Suzuki W, Tanaka K. Neuronal correlates of goal-based motor selection in the prefrontal cortex. *Science*. 2003;301(5630):229–32. <https://doi.org/10.1126/science.1084204> PMID: 12855813
12. Volkow ND, Wang G-J, Fowler JS, Tomasi D, Telang F. Addiction: beyond dopamine reward circuitry. *Proc Natl Acad Sci U S A*. 2011;108(37):15037–42. <https://doi.org/10.1073/pnas.1010654108> PMID: 21402948
13. Bloomfield MAP, Ashok AH, Volkow ND, Howes OD. The effects of  $\Delta^9$ -tetrahydrocannabinol on the dopamine system. *Nature*. 2016;539(7629):369–77. <https://doi.org/10.1038/nature20153> PMID: 27853201

14. van de Giessen E, Weinstein JJ, Cassidy CM, Haney M, Dong Z, Ghazzaoui R, et al. Deficits in striatal dopamine release in cannabis dependence. *Mol Psychiatry*. 2017;22(1):68–75. <https://doi.org/10.1038/mp.2016.21> PMID: 27001613
15. Diana M, Melis M, Gessa GL. Increase in meso-prefrontal dopaminergic activity after stimulation of CB1 receptors by cannabinoids. *Eur J Neurosci*. 1998;10(9):2825–30. <https://doi.org/10.1111/j.1460-9568.1998.00292.x> PMID: 9758152
16. Colzato LS, Hommel B. Cannabis, cocaine, and visuomotor integration: evidence for a role of dopamine D1 receptors in binding perception and action. *Neuropsychologia*. 2008;46(5):1570–5. <https://doi.org/10.1016/j.neuropsychologia.2007.12.014> PMID: 18242650
17. Mechoulam R, Parker LA. The endocannabinoid system and the brain. *Annu Rev Psychol*. 2013;64:21–47. <https://doi.org/10.1146/annurev-psych-113011-143739> PMID: 22804774
18. Romero J, Lastres-Becker I, de Miguel R, Berrendero F, Ramos JA, Fernandez-Ruiz J. The endogenous cannabinoid system and the basal ganglia: biochemical, pharmacological, and therapeutic aspects. 2002.
19. Rodríguez De Fonseca F, Del Arco I, Martín-Calderón JL, Gorriti MA, Navarro M. Role of the Endogenous Cannabinoid System in the Regulation of Motor Activity. *Neurobiology of Disease*. 1998;5:483–501.
20. Hoffman AF, Hwang EK, Lupica CR. Impairment of synaptic plasticity by cannabis,  $\Delta^9$ -THC, and synthetic cannabinoids. *Cold Spring Harb Perspect Med*. 2021;11:a039743.
21. Breivogel CS, Childers SR, Deadwyler SA, Hampson RE, Vogt LJ, Sim-Selley LJ. Chronic delta9-tetrahydrocannabinol treatment produces a time-dependent loss of cannabinoid receptors and cannabinoid receptor-activated G proteins in rat brain. *J Neurochem*. 1999;73(6):2447–59. <https://doi.org/10.1046/j.1471-4159.1999.0732447.x> PMID: 10582605
22. McKinney DL, Cassidy MP, Collier LM, Martin BR, Wiley JL, Selley DE, et al. Dose-related differences in the regional pattern of cannabinoid receptor adaptation and in vivo tolerance development to delta9-tetrahydrocannabinol. *J Pharmacol Exp Ther*. 2008;324(2):664–73. <https://doi.org/10.1124/jpet.107.130328> PMID: 17967938
23. Romero J, Garcia-Palomero E, Castro JG, Garcia-Gil L, Ramos JA, Fernandez-Ruiz JJ. Effects of chronic exposure to delta9-tetrahydrocannabinol on cannabinoid receptor binding and mRNA levels in several rat brain regions. *Brain Res Mol Brain Res*. 1997;46(1–2):100–8. [https://doi.org/10.1016/s0169-328x\(96\)00277-x](https://doi.org/10.1016/s0169-328x(96)00277-x) PMID: 9191083
24. Zhuang S, Kittler J, Grigorenko EV, Kirby MT, Sim LJ, Hampson RE, et al. Effects of long-term exposure to delta9-THC on expression of cannabinoid receptor (CB1) mRNA in different rat brain regions. *Brain Res Mol Brain Res*. 1998;62(2):141–9. [https://doi.org/10.1016/s0169-328x\(98\)00232-0](https://doi.org/10.1016/s0169-328x(98)00232-0) PMID: 9813289
25. Ceccarini J, Kuepper R, Kemels D, van Os J, Henquet C, Van Laere K. [18F]MK-9470 PET measurement of cannabinoid CB1 receptor availability in chronic cannabis users. *Addict Biol*. 2015;20(2):357–67. <https://doi.org/10.1111/adb.12116> PMID: 24373053
26. D'Souza DC, Cortes-Briones JA, Ranganathan M, Thurnauer H, Creatura G, Surti T, et al. Rapid Changes in Cannabinoid 1 Receptor Availability in Cannabis-Dependent Male Subjects After Abstinence From Cannabis. *Biol Psychiatry Cogn Neurosci Neuroimaging*. 2016;1(1):60–7. <https://doi.org/10.1016/j.bpsc.2015.09.008> PMID: 29560896
27. Haney M. Cannabis Use and the Endocannabinoid System: A Clinical Perspective. *Am J Psychiatry*. 2022;179(1):21–5. <https://doi.org/10.1176/appi.ajp.2021.21111138> PMID: 34974755
28. DeSanty KP, Dar MS. Cannabinoid-induced motor incoordination through the cerebellar CB(1) receptor in mice. *Pharmacol Biochem Behav*. 2001;69(1–2):251–9. [https://doi.org/10.1016/s0091-3057\(01\)00539-1](https://doi.org/10.1016/s0091-3057(01)00539-1) PMID: 11420093
29. Patel S, Hillard CJ. Cannabinoid CB(1) receptor agonists produce cerebellar dysfunction in mice. *J Pharmacol Exp Ther*. 2001;297(2):629–37. [https://doi.org/10.1016/s0022-3565\(24\)29579-3](https://doi.org/10.1016/s0022-3565(24)29579-3) PMID: 11303052
30. Cole DM, Beckmann CF, Oei NYL, Both S, van Gerven JMA, Rombouts SARB. Differential and distributed effects of dopamine neuromodulations on resting-state network connectivity. *Neuroimage*. 2013;78:59–67. <https://doi.org/10.1016/j.neuroimage.2013.04.034> PMID: 23603346
31. Lorenzetti V, Gaillard A, Thomson D, Englund A, Freeman TP. Effects of cannabinoids on resting state functional brain connectivity: A systematic review. *Neurosci Biobehav Rev*. 2023;145:105014. <https://doi.org/10.1016/j.neubiorev.2022.105014> PMID: 36563921
32. Cole MW, Ito T, Bassett DS, Schultz DH. Activity flow over resting-state networks shapes cognitive task activations. *Nat Neurosci*. 2016;19(12):1718–26. <https://doi.org/10.1038/nn.4406> PMID: 27723746
33. Biswal BB, Van Kylen J, Hyde JS. Simultaneous assessment of flow and BOLD signals in resting-state functional connectivity maps. *NMR Biomed*. 1997;10(4–5):165–70. [https://doi.org/10.1002/\(sici\)1099-1492\(199706/08\)10:4<165::aid-nbm454>3.0.co;2-7](https://doi.org/10.1002/(sici)1099-1492(199706/08)10:4<165::aid-nbm454>3.0.co;2-7) PMID: 9430343
34. Raichle ME. The restless brain. *Brain Connect*. 2011;1(1):3–12. <https://doi.org/10.1089/brain.2011.0019> PMID: 22432951
35. Mantini D, Perrucci MG, Del Gratta C, Romani GL, Corbetta M. Electrophysiological signatures of resting state networks in the human brain. *Proc Natl Acad Sci U S A*. 2007;104(32):13170–5. <https://doi.org/10.1073/pnas.0700668104> PMID: 17670949
36. Raichle ME, MacLeod AM, Snyder AZ, Powers WJ, Gusnard DA, Shulman GL. A default mode of brain function. *Proc Natl Acad Sci U S A*. 2001;98(2):676–82. <https://doi.org/10.1073/pnas.98.2.676> PMID: 11209064
37. Davis NJ, Tomlinson SP, Morgan HM. The role of  $\beta$ -frequency neural oscillations in motor control. *J Neurosci*. 2012;32(2):403–4. <https://doi.org/10.1523/JNEUROSCI.5106-11.2012> PMID: 22238075
38. Engel AK, Fries P. Beta-band oscillations—signalling the status quo?. *Curr Opin Neurobiol*. 2010;20(2):156–65. <https://doi.org/10.1016/j.conb.2010.02.015> PMID: 20359884

39. Babiloni C, Brancucci A, Vecchio F, Arendt-Nielsen L, Chen ACN, Rossini PM. Anticipation of somatosensory and motor events increases centro-parietal functional coupling: an EEG coherence study. *Clin Neurophysiol*. 2006;117(5):1000–8. <https://doi.org/10.1016/j.clinph.2005.12.028> PMID: [16516546](#)
40. Chung JW, Ofori E, Misra G, Hess CW, Vaillancourt DE. Beta-band activity and connectivity in sensorimotor and parietal cortex are important for accurate motor performance. *Neuroimage*. 2017;144(Pt A):164–73. <https://doi.org/10.1016/j.neuroimage.2016.10.008> PMID: [27746389](#)
41. Prashad S, Dedrick ES, Filbey FM. Cannabis users exhibit increased cortical activation during resting state compared to non-users. *Neuroimage*. 2018;179:176–86. <https://doi.org/10.1016/j.neuroimage.2018.06.031> PMID: [29894828](#)
42. Böcker KBE, Hunault CC, Gerritsen J, Kruidenier M, Mensinga TT, Kenemans JL. Cannabinoid modulations of resting state EEG  $\theta$  power and working memory are correlated in humans. *J Cogn Neurosci*. 2010;22(9):1906–16. <https://doi.org/10.1162/jocn.2009.21355> PMID: [19803687](#)
43. Nader DA, Sanchez ZM. Effects of regular cannabis use on neurocognition, brain structure, and function: a systematic review of findings in adults. *Am J Drug Alcohol Abuse*. 2018;44(1):4–18. <https://doi.org/10.1080/00952990.2017.1306746> PMID: [28498718](#)
44. Prashad S, Dedrick ES, To WT, Vanneste S, Filbey FM. Testing the role of the posterior cingulate cortex in processing salient stimuli in cannabis users: an rTMS study. *Eur J Neurosci*. 2019;50(3):2357–69. <https://doi.org/10.1111/ejn.14194> PMID: [30290037](#)
45. Meier MH, Caspi A, Ambler A, Harrington H, Houts R, Keefe RSE, et al. Persistent cannabis users show neuropsychological decline from childhood to midlife. *Proc Natl Acad Sci USA*. 2012;109.
46. Faul F, Erdfelder E, Lang A-G, Buchner A. G\*Power 3: a flexible statistical power analysis program for the social, behavioral, and biomedical sciences. *Behav Res Methods*. 2007;39(2):175–91. <https://doi.org/10.3758/bf03193146> PMID: [17695343](#)
47. Oldfield RC. The assessment and analysis of handedness: the Edinburgh inventory. *Neuropsychologia*. 1971;9(1):97–113. [https://doi.org/10.1016/0028-3932\(71\)90067-4](https://doi.org/10.1016/0028-3932(71)90067-4) PMID: [5146491](#)
48. Veale JF. Edinburgh Handedness Inventory - Short Form: a revised version based on confirmatory factor analysis. *Laterality*. 2014;19(2):164–77. <https://doi.org/10.1080/1357650X.2013.783045> PMID: [23659650](#)
49. Cuttler C, Spradlin A. Measuring cannabis consumption: Psychometric properties of the Daily Sessions, Frequency, Age of Onset, and Quantity of Cannabis Use Inventory (DFAQ-CU). *PLoS One*. 2017;12(5):e0178194. <https://doi.org/10.1371/journal.pone.0178194> PMID: [28552942](#)
50. Adamson SJ, Kay-Lambkin FJ, Baker AL, Lewin TJ, Thornton L, Kelly BJ, et al. An improved brief measure of cannabis misuse: the Cannabis Use Disorders Identification Test-Revised (CUDIT-R). *Drug Alcohol Depend*. 2010;110(1–2):137–43. <https://doi.org/10.1016/j.drugalcdep.2010.02.017> PMID: [20347232](#)
51. Stephens RS, Babor TF, Kadden R, Miller M, Marijuana Treatment Project Research Group. The Marijuana Treatment Project: rationale, design and participant characteristics. *Addiction*. 2002;97 Suppl 1:109–24. <https://doi.org/10.1046/j.1360-0443.97.s01.6.x> PMID: [12460133](#)
52. Saunders JB, Aasland OG, Babor TF, De La Fuente JR, Grant M. Development of the Alcohol Use Disorders Identification Test (AUDIT): WHO Collaborative Project on Early Detection of Persons with Harmful Alcohol Consumption-II. *Addiction*. 1993;88:791–804.
53. Fagerstrom KO, Schneider NG. Measuring nicotine dependence: a review of the Fagerstrom Tolerance Questionnaire. *J Behav Med*. 1989;12(2):159–82. <https://doi.org/10.1007/BF00846549> PMID: [2668531](#)
54. Lovibond PF, Lovibond SH. The structure of negative emotional states: comparison of the Depression Anxiety Stress Scales (DASS) with the Beck Depression and Anxiety Inventories. *Behav Res Ther*. 1995;33(3):335–43. [https://doi.org/10.1016/0005-7967\(94\)00075-u](https://doi.org/10.1016/0005-7967(94)00075-u) PMID: [7726811](#)
55. Broadbent DE, Cooper PF, FitzGerald P, Parkes KR. The Cognitive Failures Questionnaire (CFQ) and its correlates. *Br J Clin Psychol*. 1982;21(1):1–16. <https://doi.org/10.1111/j.2044-8260.1982.tb01421.x> PMID: [7126941](#)
56. Lay CH. At last, my research article on procrastination. *Journal of Research in Personality*. 1986;20:474–95.
57. Cacioppo JT, Petty RE, Kao CF. The efficient assessment of need for cognition. *Journal of Personality Assessment*. 1984;48:306–307.
58. Fournier LR, Prashad S, Mouradian H, Paek AY. Will you procrastinate? Sensitivity to potential performance costs and effort in chronic cannabis users and non-users. *Psychol Res*. 2025;89(4):129. <https://doi.org/10.1007/s00426-025-02139-8> PMID: [40760056](#)
59. Heishman SJ, Evans RJ, Singleton EG, Levin KH, Copersino ML, Gorelick DA. Reliability and validity of a short form of the Marijuana Craving Questionnaire. *Drug Alcohol Depend*. 2009;102(1–3):35–40. <https://doi.org/10.1016/j.drugalcdep.2008.12.010> PMID: [19217724](#)
60. Nissen MJ, Bullemer P. Attentional requirements of learning: Evidence from performance measures. *Cognitive Psychology*. 1987;19(1):1–32. [https://doi.org/10.1016/0010-0285\(87\)90002-8](https://doi.org/10.1016/0010-0285(87)90002-8)
61. Corsi PM. Human memory and the medial temporal region of the brain. McGill University. 1972.
62. Hart SG, Staveland LE. Development of NASA-TLX (Task Load Index): Results of empirical and theoretical research. *Advances in Psychology*. Elsevier. 1988. 139–83.
63. MacDonald AW 3rd, Pogue-Geile MF, Johnson MK, Carter CS. A specific deficit in context processing in the unaffected siblings of patients with schizophrenia. *Arch Gen Psychiatry*. 2003;60(1):57–65. <https://doi.org/10.1001/archpsyc.60.1.57> PMID: [12511173](#)
64. Fournier LR, Stubblefield AM, Dyre BP, Rosenbaum DA. Starting or finishing sooner? Sequencing preferences in object transfer tasks. *Psychol Res*. 2019;83(8):1674–84. <https://doi.org/10.1007/s00426-018-1022-7> PMID: [29687233](#)
65. Nasreddine ZS, Phillips NA, Bédirian V, Charbonneau S, Whitehead V, Collin I, et al. The Montreal Cognitive Assessment, MoCA: a brief screening tool for mild cognitive impairment. *J Am Geriatr Soc*. 2005;53(4):695–9. <https://doi.org/10.1111/j.1532-5415.2005.53221.x> PMID: [15817019](#)

66. Chang C-Y, Hsu S-H, Pion-Tonachini L, Jung T-P. Evaluation of Artifact Subspace Reconstruction for Automatic Artifact Components Removal in Multi-Channel EEG Recordings. *IEEE Trans Biomed Eng*. 2020;67(4):1114–21. <https://doi.org/10.1109/TBME.2019.2930186> PMID: 31329105
67. Mullen T, Kothe C, Chi YM, Ojeda A, Kerth T, Makeig S, et al. Real-time modeling and 3D visualization of source dynamics and connectivity using wearable EEG. *Annu Int Conf IEEE Eng Med Biol Soc*. 2013;2013:2184–7. <https://doi.org/10.1109/EMBC.2013.6609968> PMID: 24110155
68. Pion-Tonachini L, Kreutz-Delgado K, Makeig S. ICLabel: An automated electroencephalographic independent component classifier, dataset, and website. *Neuroimage*. 2019;198:181–97. <https://doi.org/10.1016/j.neuroimage.2019.05.026> PMID: 31103785
69. Delorme A, Makeig S. EEGLAB: an open source toolbox for analysis of single-trial EEG dynamics including independent component analysis. *J Neurosci Methods*. 2004;134(1):9–21. <https://doi.org/10.1016/j.jneumeth.2003.10.009> PMID: 15102499
70. Delorme A, Sejnowski T, Makeig S. Enhanced detection of artifacts in EEG data using higher-order statistics and independent component analysis. *Neuroimage*. 2007;34(4):1443–9. <https://doi.org/10.1016/j.neuroimage.2006.11.004> PMID: 17188898
71. Pion-Tonachini L, Makeig S, Kreutz-Delgado K. Crowd labeling latent Dirichlet allocation. *Knowl Inf Syst*. 2017;53(3):749–65. <https://doi.org/10.1007/s10115-017-1053-1> PMID: 30416242
72. Welch P. The use of fast Fourier transform for the estimation of power spectra: A method based on time averaging over short, modified periodograms. *IEEE Trans Audio Electroacoust*. 1967;15(2):70–3. <https://doi.org/10.1109/tau.1967.1161901>
73. Ratcliff R. Methods for dealing with reaction time outliers. *Psychol Bull*. 1993;114(3):510–32. <https://doi.org/10.1037/0033-2909.114.3.510> PMID: 8272468
74. Whelan R. Effective analysis of reaction time data. *Psychological Record*. 2008;58:475–82.
75. Robertson EM. The serial reaction time task: implicit motor skill learning?. *J Neurosci*. 2007;27(38):10073–5. <https://doi.org/10.1523/JNEUROSCI.2747-07.2007> PMID: 17881512
76. Du Y, Prashad S, Schoenbrun I, Clark JE. Probabilistic Motor Sequence Yields Greater Offline and Less Online Learning than Fixed Sequence. *Front Hum Neurosci*. 2016;10:87. <https://doi.org/10.3389/fnhum.2016.00087> PMID: 26973502
77. Unsworth N, Engle RW. Individual differences in working memory capacity and learning: evidence from the serial reaction time task. *Mem Cognit*. 2005;33(2):213–20. <https://doi.org/10.3758/bf03195310> PMID: 16028576
78. Smith DE. Acute and Chronic Toxicity of Marijuana. *Journal of Psychedelic Drugs*. 1968;2(1):37–48. <https://doi.org/10.1080/02791072.1968.10524399>
79. McGlothlin WH, West LJ. The marijuana problem: an overview. *Am J Psychiatry*. 1968;125(3):126–34. <https://doi.org/10.1176/ajp.125.3.370> PMID: 5667203
80. Hirst RB, Young KR, Sodos LM, Wickham RE, Earleywine M. Trying to remember: Effort mediates the relationship between frequency of cannabis use and memory performance. *J Clin Exp Neuropsychol*. 2017;39(5):502–12. <https://doi.org/10.1080/13803395.2016.1237617> PMID: 27753292
81. Lawn W, Freeman TP, Pope RA, Joye A, Harvey L, Hindocha C, et al. Acute and chronic effects of cannabinoids on effort-related decision-making and reward learning: an evaluation of the cannabis “amotivational” hypotheses. *Psychopharmacology (Berl)*. 2016;233(19–20):3537–52. <https://doi.org/10.1007/s00213-016-4383-x> PMID: 27585792
82. Vele KC, Cavalli JM, Cservenk A. Effort-based decision making and self-reported apathy in frequent cannabis users and healthy controls: A replication and extension. *J Clin Exp Neuropsychol*. 2022;44(2):146–62. <https://doi.org/10.1080/13803395.2022.2093335> PMID: 35767680
83. Acuff SF, Simon NW, Murphy JG. Effort-related decision making and cannabis use among college students. *Exp Clin Psychopharmacol*. 2023;31(1):228–37. <https://doi.org/10.1037/pha0000544> PMID: 35084912
84. Taylor MB, Filbey FM. Residual Effects of Cannabis Use on Effort-Based Decision-Making. *J Int Neuropsychol Soc*. 2021;27(6):559–69. <https://doi.org/10.1017/S1355617721000473> PMID: 34261555
85. Skumlien M, Mokrysz C, Freeman TP, Valton V, Wall MB, Bloomfield M, et al. Anhedonia, Apathy, Pleasure, and Effort-Based Decision-Making in Adult and Adolescent Cannabis Users and Controls. *Int J Neuropsychopharmacol*. 2023;26(1):9–19. <https://doi.org/10.1093/ijnp/pyac056> PMID: 35999024
86. Skumlien M, Langley C, Sahakian BJ. Is cannabis use associated with motivation? A review of recent acute and non-acute studies. *Curr Behav Neurosci Rep*. 2024;11:33–43.
87. Petrucci AS, LaFrance EM, Cuttler C. A Comprehensive Examination of the Links between Cannabis Use and Motivation. *Subst Use Misuse*. 2020;55(7):1155–64. <https://doi.org/10.1080/10826084.2020.1729203> PMID: 32100610
88. Doyon J, Benali H. Reorganization and plasticity in the adult brain during learning of motor skills. *Curr Opin Neurobiol*. 2005;15(2):161–7. <https://doi.org/10.1016/j.conb.2005.03.004> PMID: 15831397
89. Ungerleider LG, Doyon J, Karni A. Imaging brain plasticity during motor skill learning. *Neurobiol Learn Mem*. 2002;78(3):553–64. <https://doi.org/10.1006/nlme.2002.4091> PMID: 12559834
90. Blithikioti C, Miquel L, Paniello B, Nuño L, Gual A, Ballester BR, et al. Chronic cannabis use affects cerebellum dependent visuomotor adaptation. *J Psychiatr Res*. 2022;156:8–15. <https://doi.org/10.1016/j.jpsychires.2022.10.007> PMID: 36219905
91. Herreros I, Miquel L, Blithikioti C, Nuño L, Rubio Ballester B, Grechuta K, et al. Motor Adaptation Impairment in Chronic Cannabis Users Assessed by a Visuomotor Rotation Task. *J Clin Med*. 2019;8(7):1049. <https://doi.org/10.3390/jcm8071049> PMID: 31323815



92. den Boon FS, Werkman TR, Schaafsma-Zhao Q, Houthuijs K, Vitalis T, Kruse CG, et al. Activation of type-1 cannabinoid receptor shifts the balance between excitation and inhibition towards excitation in layer II/III pyramidal neurons of the rat prelimbic cortex. *Pflugers Arch*. 2015;467(7):1551–64. <https://doi.org/10.1007/s00424-014-1586-z> PMID: [25081244](#)
93. Renard J, Szkudlarek HJ, Kramar CP, Jobson CEL, Moura K, Rushlow WJ. Adolescent THC Exposure Causes Enduring Prefrontal Cortical Disruption of GABAergic Inhibition and Dysregulation of Sub-Cortical Dopamine Function. *Sci Rep*. 2017;7:11420. <https://doi.org/10.1038/s41598-017-11862-2>
94. Tempel T, Frings C, Pastötter B. EEG beta power increase indicates inhibition in motor memory. *International Journal of Psychophysiology*. 2020;150:92–9.
95. Lum JAG, Clark GM, Barhoun P, Hill AT, Hyde C, Wilson PH. Neural basis of implicit motor sequence learning: Modulation of cortical power. *Psychophysiology*. 2023;60(2):e14179. <https://doi.org/10.1111/psyp.14179> PMID: [36087042](#)
96. Herrojo Ruiz M, Brücke C, Nikulin VV, Schneider G-H, Kühn AA. Beta-band amplitude oscillations in the human internal globus pallidus support the encoding of sequence boundaries during initial sensorimotor sequence learning. *NeuroImage*. 2014;85:779–93.
97. Pollok B, Latz D, Krause V, Butz M, Schnitzler A. Changes of motor-cortical oscillations associated with motor learning. *Neuroscience*. 2014;275:47–53. <https://doi.org/10.1016/j.neuroscience.2014.06.008> PMID: [24931763](#)
98. Cortes-Briones JA, Cahill JD, Skosnik PD, Mathalon DH, Williams A, Sewell RA, et al. The psychosis-like effects of  $\Delta(9)$ -tetrahydrocannabinol are associated with increased cortical noise in healthy humans. *Biol Psychiatry*. 2015;78(11):805–13. <https://doi.org/10.1016/j.biopsych.2015.03.023> PMID: [25913109](#)
99. Laprevote V, Bon L, Krieg J, Schwitzer T, Bourion-Bedes S, Maillard L, et al. Association between increased EEG signal complexity and cannabis dependence. *Eur Neuropsychopharmacol*. 2017;27(12):1216–22. <https://doi.org/10.1016/j.euroneuro.2017.10.038> PMID: [29132831](#)
100. Wagner I, Wolf C, Schütz AC. Motor learning by selection in visual working memory. *Sci Rep*. 2021;11(1):9331. <https://doi.org/10.1038/s41598-021-87572-6> PMID: [33927227](#)
101. Bo J, Seidler RD. Visuospatial working memory capacity predicts the organization of acquired explicit motor sequences. *J Neurophysiol*. 2009;101(6):3116–25. <https://doi.org/10.1152/jn.00006.2009> PMID: [19357338](#)
102. Paul S, Bhattacharyya S. Cannabis use-related working memory deficit mediated by lower left hippocampal volume. *Addict Biol*. 2021;26(4):e12984. <https://doi.org/10.1111/adb.12984> PMID: [33155343](#)
103. Fadda P, Robinson L, Fratta W, Pertwee RG, Riedel G. Differential effects of THC- or CBD-rich cannabis extracts on working memory in rats. *Neuropharmacology*. 2004;47(8):1170–9. <https://doi.org/10.1016/j.neuropharm.2004.08.009> PMID: [15567426](#)
104. Varvel SA, Hamm RJ, Martin BR, Lichtman AH. Differential effects of delta 9-THC on spatial reference and working memory in mice. *Psychopharmacology (Berl)*. 2001;157(2):142–50. <https://doi.org/10.1007/s002130100780> PMID: [11594438](#)
105. Gessa GL, Melis M, Muntoni AL, Diana M. Cannabinoids activate mesolimbic dopamine neurons by an action on cannabinoid CB1 receptors. *Eur J Pharmacol*. 1998;341(1):39–44. [https://doi.org/10.1016/s0014-2999\(97\)01442-8](https://doi.org/10.1016/s0014-2999(97)01442-8) PMID: [9489854](#)
106. Williams GV, Goldman-Rakic PS. Modulation of memory fields by dopamine D1 receptors in prefrontal cortex. *Nature*. 1995;376(6541):572–5. <https://doi.org/10.1038/376572a0> PMID: [7637804](#)
107. Zahrt J, Taylor JR, Mathew RG, Arnsten AF. Supranormal stimulation of D1 dopamine receptors in the rodent prefrontal cortex impairs spatial working memory performance. *J Neurosci*. 1997;17(21):8528–35. <https://doi.org/10.1523/JNEUROSCI.17-21-08528.1997> PMID: [9334425](#)
108. Lee D, Schroeder JR, Karschner EL, Goodwin RS, Hirvonen J, Gorelick DA, et al. Cannabis withdrawal in chronic, frequent cannabis smokers during sustained abstinence within a closed residential environment. *Am J Addict*. 2014;23(3):234–42. <https://doi.org/10.1111/j.1521-0391.2014.12088.x> PMID: [24724880](#)
109. Haney M, Ward AS, Comer SD, Foltin RW, Fischman MW. Abstinence symptoms following oral THC administration to humans. *Psychopharmacology (Berl)*. 1999;141(4):385–94. <https://doi.org/10.1007/s002130050848> PMID: [10090646](#)
110. Haney M, Ward AS, Comer SD, Foltin RW, Fischman MW. Abstinence symptoms following smoked marijuana in humans. *Psychopharmacology (Berl)*. 1999;141(4):395–404. <https://doi.org/10.1007/s002130050849> PMID: [10090647](#)
111. Kouri EM, Pope HG Jr. Abstinence symptoms during withdrawal from chronic marijuana use. *Exp Clin Psychopharmacol*. 2000;8(4):483–92. <https://doi.org/10.1037//1064-1297.8.4.483> PMID: [11127420](#)
112. Budney AJ, Hughes JR, Moore BA, Novy PL. Marijuana abstinence effects in marijuana smokers maintained in their home environment. *Arch Gen Psychiatry*. 2001;58(10):917–24. <https://doi.org/10.1001/archpsyc.58.10.917> PMID: [11576029](#)
113. Budney AJ, Hughes JR, Moore BA, Vandrey R. Review of the validity and significance of cannabis withdrawal syndrome. *Am J Psychiatry*. 2004;161(11):1967–77. <https://doi.org/10.1176/appi.ajp.161.11.1967> PMID: [15514394](#)
114. Shackman AJ, Sarinopoulos I, Maxwell JS, Pizzagalli DA, Lavric A, Davidson RJ. Anxiety selectively disrupts visuospatial working memory. *Emotion*. 2006;6(1):40–61. <https://doi.org/10.1037/1528-3542.6.1.40> PMID: [16637749](#)
115. Eysenck M, Payne S, Derakshan N. Trait anxiety, visuospatial processing, and working memory. *Cognition & Emotion*. 2005;19(8):1214–28. <https://doi.org/10.1080/02699930500260245>
116. Moran TP. Anxiety and working memory capacity: A meta-analysis and narrative review. *Psychol Bull*. 2016;142(8):831–64. <https://doi.org/10.1037/bul0000051> PMID: [26963369](#)



117. Pascual-Marqui RD. Standardized low resolution brain electromagnetic. *Clinical Pharmacology*. 2002;24:5–12.
118. Delorme A, Palmer J, Onton J, Oostenveld R, Makeig S. Independent EEG Sources Are Dipolar. *PLoS ONE*. 2012;7:e30135.
119. Westner BU, Dalal SS, Gramfort A, Litvak V, Mosher JC, Oostenveld R, et al. A unified view on beamformers for M/EEG source reconstruction. *Neuroimage*. 2022;246:118789. <https://doi.org/10.1016/j.neuroimage.2021.118789> PMID: [34890794](#)
120. Rubinov M, Sporns O. Complex network measures of brain connectivity: uses and interpretations. *Neuroimage*. 2010;52(3):1059–69. <https://doi.org/10.1016/j.neuroimage.2009.10.003> PMID: [19819337](#)
121. Kaag AM, Cousijn J, Kroon E. Unravelling gender differences in cannabis cue-reactivity in individuals who use cannabis. *Prog Neuropsychopharmacol Biol Psychiatry*. 2025;142:111515. <https://doi.org/10.1016/j.pnpbp.2025.111515> PMID: [41043644](#)
122. Schnakenberg Martin AM, D'Souza DC, Newman SD, Hetrick WP, O'Donnell BF. Differential Cognitive Performance in Females and Males with Regular Cannabis Use. *J Int Neuropsychol Soc*. 2021;27(6):570–80. <https://doi.org/10.1017/S1355617721000606> PMID: [34261548](#)
123. Prashad S, Hammonds RP, Wiese AL, Milligan AL, Filbey FM. Sex-related differences in subjective, but not neural, cue-elicited craving response in heavy cannabis users. *Drug Alcohol Depend*. 2020;209:107931. <https://doi.org/10.1016/j.drugalcdep.2020.107931> PMID: [32113057](#)
